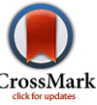

## Correction

# Correction: Online Survival Analysis Software to Assess the Prognostic Value of Biomarkers Using Transcriptomic Data in Non-Small-Cell Lung Cancer

The *PLOS ONE* Staff

## Notice of Republication

This article was republished on September 17, 2014, due to the release of confidential or copyrighted information. Please download the article again to view the corrected version.

## Reference

1. Györfy B, Surowiak P, Budczies J, Lániczky A (2013) Online Survival Analysis Software to Assess the Prognostic Value of Biomarkers Using Transcriptomic Data in Non-Small-Cell Lung Cancer. *PLoS ONE* 8(12): e82241. doi:10.1371/journal.pone.0082241

**Citation:** The *PLOS ONE* Staff (2014) Correction: Online Survival Analysis Software to Assess the Prognostic Value of Biomarkers Using Transcriptomic Data in Non-Small-Cell Lung Cancer. *PLoS ONE* 9(10): e111842. doi:10.1371/journal.pone.0111842

**Published:** October 22, 2014

**Copyright:** © 2014 The *PLOS ONE* Staff. This is an open-access article distributed under the terms of the Creative Commons Attribution License, which permits unrestricted use, distribution, and reproduction in any medium, provided the original author and source are credited.
